# Supplementary material
Source: publisher site journal article supplement (https://www.dovepress.com/article/537489)
Supplement: Supplementary file 1 [file 537489%20Supplementary%20Material.doc]

**Supplementary Material 1 An interview outline**

1. What are your usual bedtime, sleep latency period, and wake-up times? What are your sleep habits? What factors do you think (such as environmental, physiological, and psychological factors) can affect the quality of your sleep?
2. What is your main sleeping position at night (supine/lateral/prone)? Is there a frequent change in sleeping position?
3. What are your feelings or experiences when wearing the Huawei Band 9 at night? Do you experience discomfort such as wrist compression, skin itching, allergies, etc? Are you worried about missing or inaccurate sleep data, which may affect your sleep process or nighttime awakenings?
4. Do you think the elasticity of wearing the Huawei Band 9 is appropriate? If it is not suitable, is it manifested as being too tight (such as hand swelling) or too loose (such as equipment sliding)?
5. Have you actively adjusted the position of the Huawei Band 9 during your sleep? If so, what are the frequency, timing, and specific reasons for the adjustment?
6. When you sleep, where do you usually place your arm wearing the Huawei Band 9 on your body (such as when lying down with arms flat/raised, or when lying on the side with arms under pressure, etc.)?

**Supplementary Fig. S1 Bland-Altman Plots**

**
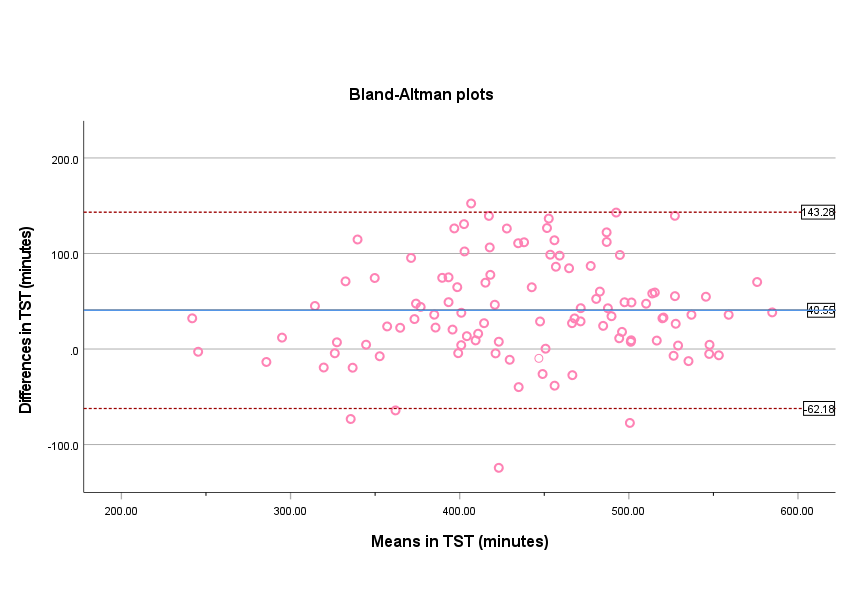
**

The Bland-Altman Plots for TST Measurements Using PSG and HWB 9
